# Supplementary material
Source: HighWire-hosted journal article supplement (https://bmjopen.bmj.com/content/10/12/e037269)
Supplement: inline-supplementary-material-1 [file inline-supplementary-material-1.pdf]

**Supplementary Table 1: Characteristics of rapid responses submitted to BMJ.com between 25<sup>th</sup> April 1998 and 23<sup>rd</sup> March 2018 broken down by gender. API and AIAN stand for “Asian and Pacific Islander” and “American Indian and Alaska Native” respectively. Plus-minus values are means  $\pm$  SD. Percentages may not sum to 100% due to rounding.**

| Characteristic                            | Male<br>(n=70256) | Female<br>(n=18592) | Mostly male<br>(n=2434) | Mostly female<br>(n=1321) | Androgynous<br>(n=1021) | Unknown<br>(n=19641) |
|-------------------------------------------|-------------------|---------------------|-------------------------|---------------------------|-------------------------|----------------------|
| Author ethnicity [number (%)]             |                   |                     |                         |                           |                         |                      |
| White                                     | 63562 (90.5)      | 16567 (89.1)        | 1635 (67.2)             | 1145 (86.7)               | 449 (44.0)              | 10719 (54.6)         |
| API                                       | 4765 (6.7)        | 1686 (9.1)          | 740 (30.4)              | 155 (11.7)                | 548 (53.7)              | 7865 (40.0)          |
| Hispanic                                  | 1400 (2.0)        | 189 (1.0)           | 38 (1.6)                | 17 (1.3)                  | 1 (0.1)                 | 258 (1.3)            |
| Black                                     | 325 (0.5)         | 99 (0.5)            | 15 (0.6)                | 2 (0.2)                   | 22 (2.2)                | 741 (3.8)            |
| AIAN                                      | 1 (0.0)           | 1 (0.0)             | 0 (0.0)                 | 0 (0.0)                   | 0 (0)                   | 0 (0.0)              |
| Unknown                                   | 203 (0.3)         | 50 (0.3)            | 6 (0.2)                 | 2 (0.2)                   | 1 (0.1)                 | 58 (0.3)             |
| Word count                                | 314 $\pm$ 324     | 330 $\pm$ 337       | 310 $\pm$ 264           | 322 $\pm$ 327             | 360 $\pm$ 319           | 297 $\pm$ 280        |
| Flesch reading ease                       | 50.0 $\pm$ 15.9   | 50.4 $\pm$ 16.1     | 50.3 $\pm$ 13.6         | 52.0 $\pm$ 14.3           | 48.2 $\pm$ 16.9         | 51.1 $\pm$ 18.0      |
| Has references [number (%)]               | 25654 (36.5)      | 6087 (32.7)         | 853 (35.0)              | 405 (30.7)                | 463 (45.3)              | 6711 (34.2)          |
| Number of references                      | 1.4 $\pm$ 3.0     | 1.2 $\pm$ 3.1       | 1.2 $\pm$ 2.5           | 1.0 $\pm$ 2.3             | 2.3 $\pm$ 4.1           | 1.2 $\pm$ 2.6        |
| Author position [number (%)]              |                   |                     |                         |                           |                         |                      |
| Consultant                                | 11408 (16.2)      | 1303 (7.0)          | 345 (14.2)              | 138 (10.4)                | 150 (14.7)              | 2947 (15.0)          |
| Professor                                 | 6570 (9.4)        | 1001 (5.4)          | 252 (10.4)              | 110 (8.3)                 | 138 (13.5)              | 1888 (9.6)           |
| Senior                                    | 2694 (3.8)        | 847 (4.6)           | 78 (3.2)                | 79 (6.0)                  | 42 (4.1)                | 751 (3.8)            |
| Student                                   | 1483 (2.1)        | 796 (4.3)           | 47 (1.9)                | 82 (6.2)                  | 42 (4.1)                | 630 (3.2)            |
| Other                                     | 48101 (68.5)      | 14645 (78.8)        | 1712 (70.3)             | 912 (69.0)                | 649 (63.6)              | 13425 (68.4)         |
| Twitter handle present [number (%)]       | 1118 (1.6)        | 345 (1.9)           | 50 (2.1)                | 23 (1.7)                  | 22 (2.2)                | 310 (1.6)            |
| US spelling and grammar errors            | 27.1 $\pm$ 47.0   | 27.7 $\pm$ 44.9     | 26.3 $\pm$ 25.8         | 25.9 $\pm$ 37.9           | 32.8 $\pm$ 42.7         | 25.7 $\pm$ 35.8      |
| UK spelling and grammar errors            | 8.9 $\pm$ 17.6    | 9.2 $\pm$ 20.1      | 9.0 $\pm$ 20.2          | 9.7 $\pm$ 15.4            | 8.0 $\pm$ 15.8          | 8.7 $\pm$ 17.2       |
| Multiple authors [number (%)]             | 10436 (14.9)      | 4386 (23.6)         | 401 (16.5)              | 227 (17.2)                | 299 (29.3)              | 3507 (17.9)          |
| Competing interests declared [number (%)] | 3902 (5.6)        | 1011 (5.4)          | 99 (4.1)                | 55 (4.2)                  | 88 (8.6)                | 1029 (5.2)           |

**Supplementary Table 2: Characteristics of rapid responses submitted to BMJ.com between 25<sup>th</sup> April 1998 and 23<sup>rd</sup> March 2018 broken down by ethnicity. API and AIAN stand for “Asian and Pacific Islander” and “American Indian and Alaska Native” respectively. Plus-minus values are means  $\pm$  SD. Percentages may not sum to 100% due to rounding.**

| Characteristic                            | White<br>(n=94077) | API<br>(n=15759) | Hispanic<br>(n=1903) | Black<br>(n=1203) | AIAN<br>(n=2)  | Unknown<br>(n=320) |
|-------------------------------------------|--------------------|------------------|----------------------|-------------------|----------------|--------------------|
| Author gender [number (%)]                |                    |                  |                      |                   |                |                    |
| Male                                      | 63562 (67.6)       | 4765 (30.2)      | 1400 (73.6)          | 325 (27.0)        | 1 (50)         | 203 (63.4)         |
| Female                                    | 16567 (17.6)       | 1686 (10.7)      | 189 (9.9)            | 99 (8.2)          | 1 (50)         | 50 (15.6)          |
| Mostly male                               | 1635 (1.7)         | 740 (4.7)        | 38 (2.0)             | 15(1.2)           | 0              | 6 (1.9)            |
| Mostly female                             | 1145 (1.2)         | 155 (1.0)        | 17 (0.9)             | 2 (0.2)           | 0              | 2 (0.6)            |
| Androgynous                               | 449 (0.5)          | 548 (3.5)        | 1 (0.1)              | 22 (1.8)          | 0              | 1 (0.3)            |
| Unknown                                   | 10719 (11.4)       | 7865 (49.9)      | 258 (13.6)           | 741 (61.5)        | 0              | 58 (18.1)          |
| Word count                                | 318 $\pm$ 328      | 295 $\pm$ 259    | 317 $\pm$ 267        | 316 $\pm$ 279     | 157 $\pm$ 2    | 310 $\pm$ 247      |
| Flesch reading ease                       | 50.3 $\pm$ 16.4    | 50.7 $\pm$ 15.7  | 49.7 $\pm$ 14.4      | 47.7 $\pm$ 16.7   | 18.4 $\pm$ 4.5 | 47.2 $\pm$ 15.6    |
| Has references [number (%)]               | 32887 (35.0)       | 5990 (38.0)      | 769 (40.4)           | 391 (32.5)        | 0 (0)          | 136 (42.5)         |
| Number of references                      | 1.3 $\pm$ 3.0      | 1.4 $\pm$ 2.7    | 1.6 $\pm$ 2.8        | 1.2 $\pm$ 2.8     | 0.0 $\pm$ 0.0  | 1.7 $\pm$ 2.9      |
| Author position [number (%)]              |                    |                  |                      |                   |                |                    |
| Consultant                                | 13662 (14.5)       | 2276 (14.4)      | 82 (4.3)             | 222 (18.5)        | 0 (0.0)        | 49 (15.3)          |
| Professor                                 | 7821 (8.3)         | 1715 (10.9)      | 280 (14.7)           | 114 (9.5)         | 0 (0.0)        | 29 (9.1)           |
| Senior                                    | 3691 (3.9)         | 707 (4.5)        | 37 (1.9)             | 50 (4.2)          | 0 (0.0)        | 6 (1.9)            |
| Student                                   | 2231 (2.4)         | 727 (4.6)        | 69 (3.6)             | 37 (3.1)          | 0 (0.0)        | 16 (5.0)           |
| Other                                     | 66672 (70.9)       | 10334 (65.6)     | 1435 (75.4)          | 781 (64.9)        | 2 (100)        | 220 (68.8)         |
| Twitter handle present [number (%)]       | 1547 (1.6)         | 283 (1.8)        | 27 (1.4)             | 11 (0.9)          | 0 (0.0)        | 0 (0.0)            |
| US spelling and grammar errors            | 27.2 $\pm$ 46.2    | 25.5 $\pm$ 35.7  | 29.7 $\pm$ 34.6      | 26.3 $\pm$ 32.1   | 13.0 $\pm$ 4.2 | 25.5 $\pm$ 29.3    |
| UK spelling and grammar errors            | 9.1 $\pm$ 18.3     | 7.7 $\pm$ 17.5   | 7.9 $\pm$ 11.7       | 9.5 $\pm$ 15.2    | 7.0 $\pm$ 9.9  | 5.9 $\pm$ 11.2     |
| Multiple authors [number (%)]             | 14580 (15.5)       | 3865 (24.5)      | 531 (27.9)           | 207 (17.2)        | 0 (0)          | 73 (22.8)          |
| Competing interests declared [number (%)] | 5047 (5.4)         | 939 (6.0)        | 82 (4.3)             | 37 (3.1)          | 0 (0)          | 79 (24.7)          |
